# Supplementary material
Source: MDPI journal article supplement (https://www.mdpi.com/2311-5637/9/8/721)
Supplement: s1 [file s1]

# Evaluation of long-term fermentation performance with engineered *Saccharomyces cerevisiae* strains

Maarten L. De Mol <sup>1</sup>, Victoria Marcoen <sup>1</sup>, Isabelle Maryns <sup>1</sup>, Nico Snoeck <sup>a</sup>, Joeri J. Beauprez <sup>2</sup>, Sofie

L. De Maeseneire <sup>1,\*</sup> and Wim K. Soetaert <sup>1</sup>

<sup>1</sup> Centre for Industrial Biotechnology and Biocatalysis (InBio.be), Faculty of Bioscience Engineering, Ghent University, Coupure Links 653, 9000 Ghent, Belgium

<sup>2</sup> Inbiose N.V., Technologiepark Zwijnaarde 3 – bus 41, 9052 Ghent, Belgium

To whom correspondence should be addressed. E-mail: Sofie.DeMaeseneire@UGent.be

## Contents

|                             |   |
|-----------------------------|---|
| SUPPLEMENTARY FIGURES ..... | 3 |
| SUPPLEMENTARY TABLES .....  | 7 |

## SUPPLEMENTARY FIGURES

CONSTRUCT linear DNA ADH6

DEFINITION ADH6

LENGTH 4200

FEATURES Location/Qualifiers

misc\_feature 1..640  
/region="upstream homologous region of the *ADH6* locus"  
misc\_feature 641..843  
/region="UAS\_TEF1"  
/product="upstream activating sequence of the *TEF1* gene"  
misc\_feature 844..1052  
/region="TEF1 promoter"  
CDS 1053..1769  
/gene="yECFP fluorescent protein"  
misc\_feature 1770..2020  
/region="CYC1 terminator"  
misc\_feature 2051..2084  
/region="loxP recombination site"  
misc\_feature 2085..2482  
/region="TEF1 promoter"  
CDS 2483..3136  
/gene="HIS5 auxotrophic selection marker"  
/product="imidazoleglycerol-phosphate dehydratase"  
misc\_feature 3137..3398  
/region="TEF1 terminator"  
misc\_feature 3399..3432  
/region="loxP recombination site"  
misc\_feature 3573..4200  
/region="downstream homologous region of the *ADH6* locus"

ORIGIN

1 gtagcgatcg accttagaac tttatttag ttgtacata tacctcacct gagttttgct  
61 tttttctctg ggagcctaaa ccatttaaaa tgatatataa tagataataa atccaggata  
121 aaatgtggct aattgatctt tttcatctt caactggga atgacgtact ggatacttc  
181 gacgctcttt ttagtcccc gatcccgctc ttccaggacc ttgacgtgga attccgatca  
241 cagccactct cgctacggct ccgttaaaat gaatggtttt ccgttacatt tactgtgtct  
301 ttatctcttt tacagtaaat ggggtgataa ctgtgacaca atttgtgtct ctactgtgtg  
361 aacttcatt gctgactaaa gattccccgc tccgcttata tgcgggtcc gtccttgacc  
421 gaagatcaca ttccaattt ttcacatctg gaagcgatac gacaatatag gagaaaaaga  
481 aaagtgaag gcaaaaaagc accaacagtt ctcgaggga agtgccgta atcttctgta  
541 taaattcggc caattcaatc taatttaata gatttgcgac agacttcac atccacattc  
601 gaggaagaaa ttaacacaaa caacaagaaa agccaaaatc atagcttcaa aatgtttcta  
661 ctctttttt actcttcag attttctcg actccgcgca tcgccgtacc acttcaaaac  
721 acccaagcac agcactacta atttcccctc ttcttctc taggggtgtc ttaattacc  
781 gtactaaaag ttggaaaag aaaaaagaga ccgcctcgtt tcttttctt cgctgaaaaa  
841 ggcaataaaa attttatca cgtttcttt tctgaaaat tttttttt gattttttc  
901 tcttcgatg acctccatt gatatttaag ttaataaacg gtttcaatt tctcaagttt  
961 cagtttcatt ttcttggtc tattacaact tttttactt ctgctcatt agaagaaag  
1021 catagcaatc taatctaagt ttaattaca aaatgtctaa aggtgaagaa ttattcactg  
1081 gtgtgtgcc aattttggtt gaattagatg gtgagttaa tggtcacaaa tttctgtct  
1141 ccggtgaagg tgaagtgat gctacttac gtaattgac cttaaaattt attgtacta  
1201 ctggtaaat ggcagttcca tggccaacct tagtactac ttaacttgg ggtgttcaat  
1261 gttttctag ataccagat catatgaac aacatgactt ttcaagtct gccatgccag  
1321 aaggttatgt tcaagaaga actattttt tcaaatga cggtaactac aagaccagag  
1381 ctgaagtcaa gttgaagggt gatacttag ttaatagaat cgaattaaaa ggtattgatt  
1441 taaagaaga tggtaacatt ttaggtcaca aattggaata cattataac tctacaatg  
1501 ttacatcac tgctgacaaa caaagaatg gtatcaaac taactcaaa attagacaca  
1561 acattgaaga tggttctgtt caattagctg accattatca aaaaatact ccaattggtg

1621 atggtccagt ctgttacca gacaaccatt acttatccac tcaatctgcc ttatccaaag  
 1681 atccaaacga aaagagagac cacatggtct tgtagaatt tgttactgct gctggtatta  
 1741 cccatggtat gtagtaattg tacaataaa tcatgtaatt agttatgta cgcttacatt  
 1801 cagccctcc tcccatatcc gcttaaccg aaaaggaagg agttagacaa cctgaagtct  
 1861 aggtccctat tttttttt taatagtat gttagtatta agaactgtat ttatatttca  
 1921 aatttttct tttttctgt aaaaacgct gtacgcatgt aacattatac tgaacacctt  
 1981 gcttgagaag gttttgggac gctcgaaggc ttaatttgc ttcgtacgt gcaggtcgac  
 2041 aacccttaataa acttctgt ataagtatg ctatacgaag ttattaggtc tagagatctg  
 2101 tttagctgc ctgtccccc cgggtcacc cggccagcga catggaggcc cagaataccc  
 2161 tcttgacag tcttgacgtg cgcagctcag gggcatgatg tgactgtcgc ccgtacattt  
 2221 agcccatata tccccatgta taatcatttg catccatata tttgatggc cgcacggcgc  
 2281 gaagcaaaaa ttacggctcc tgcgtcaga cctgcgagca gggaacgct ccctcacag  
 2341 acggttgaa ttgtccccc gccgcgccc ttagagaaa tataaaagg taggatttgc  
 2401 cactgaggtt ctctttcat atacttctt ttaaatctt gctaggatac agttctcaca  
 2461 tcacatccga acataaaca ccatgggtag gagggctttt gtagaaagaa atacgaacga  
 2521 aacgaaaac agcgttgcca tgccttggc caaagctccc ttacctgaag agtcgaattt  
 2581 tattgatgaa ctataactt ccaagcatgc aaacaaaag ggagaacaag taatccaagt  
 2641 agacacggga attggattct tggatcacat gtatcatgca ctggctaaac atgcaggctg  
 2701 gagcttaca ctctactca gaggtgattt aatcatgat gatcatcaca ctgcagaaga  
 2761 tactgctatt gcacttgga ttgcatcaa gcaggctatg ggtaacttgc ccggcgtaa  
 2821 aagatttga catgcttatt gtccactga cgaagctctt tctagaagcg tagttgactt  
 2881 gtcgggacgg ccctatgctg ttatcgattt gggattaaag cgtgaaaagg ttggggaatt  
 2941 gtctgtgaa atgatccctc acttactata ttccttttc gtagcagctg gaattacttt  
 3001 gcatgttacc tgccttatg gtagtaata ccatcatcgt gctgaaagcg cttttaaact  
 3061 tctgctgtt gccatgcgcg cggctactag tcttactgga agttctgaag tccaagcac  
 3121 gaagggagtg ttgtaagag tactgacaat aaaaagattc ttgttttcaa gaactgtca  
 3181 tttgatagt tttttatat ttagttgtt ctattttaa caaatgttag cgtgatttat  
 3241 atttttttc gcctcgacat catctgcca gatgcgaagt taagtgcgca gaaagtaata  
 3301 tcatgcgta atcgatgtg aatgctggc gctatactgc tgcgattcgc atactaacgc  
 3361 cgcacccag ttaaacgag ctctcgagaa cccttaatat aactcgtat aatgtatgt  
 3421 atacgaagt attagtgat atcagatcca ctatggcct atgcggccgc ggcactgccc  
 3481 gtctccctat agtgagtcgt attaatctg ataagccagg ttaacctgca ttaatgaatc  
 3541 ggccaacgcg cggggagagg cggttgcgt atgtgtcaa gctcttgata aatgtagctc  
 3601 cttctttt aactgctca tgtttgggt ctgtatatag gactgctgtt ttaatcgata  
 3661 taggttcat ttgaaactt tttttatgata tataaggtac ttttaataa ttacaactc  
 3721 gtacagtctt cttttgtt tttctttt ctcttgcta agcacctta aggtgaaaag  
 3781 aaacacatat caatacacta acaaaaaagg tgcacgttca tagggatcg gacaataact  
 3841 atattactaa gctacaaag caatagcgc aatacaaaa gcttcatgt taatgttcag  
 3901 ggatgcaccg gtattttct ttgccgtgt gacagtatat gttgtgctt gttagcgga  
 3961 tgaggatgtt ccatgaatc ctgccgtagg tttgttgga gatctgtta cttttcagt  
 4021 ggatgaactt agttgtgat ttaatagcga ctttggctc gagacaatta tctttcaag  
 4081 ggtagtttca cccctcccga tcggacttc agttgaagat ttcgaacag ttgatgtgtt  
 4141 ttctgctta gtggttgata ctctctga atttttagt gacttgctt ttgctccctc

//

**Supplementary Figure S1** Annotated Genbank file of the integration cassette for the genomic modification of baker's yeast at the *ADH6* locus. Similar integration cassettes for other genomic locations were made, for which the homologous regions of *ADH6* were replaced by the once of the corresponding integration locus (sequence given in Supplementary Table S2). The selection marker present between the LoxP sites for the integration at other genomic locations, was *LEU2* instead of *HIS5*.

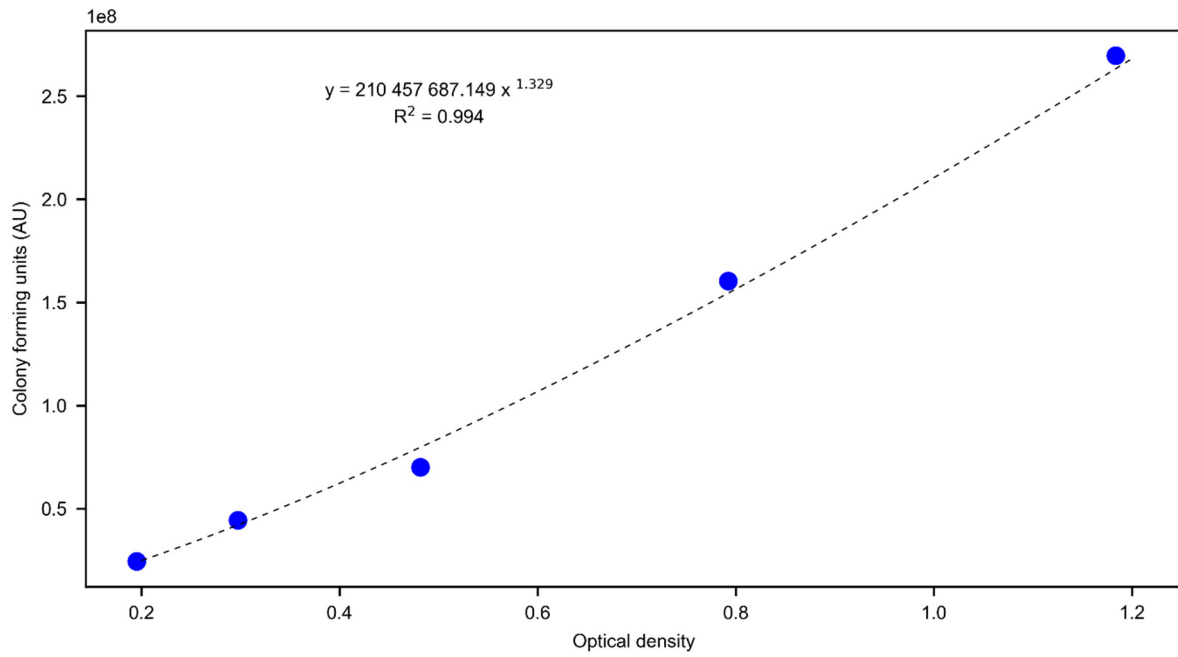

**Supplementary Figure S2.** Correlation between the optical density (OD) at wavelength 600 nm and the colony forming units (CFU) of the wild-type yeast used in this study. As for some samples the OD was above 1.0, an exponential standard curve was established according to the spectrophotometer's specifics.

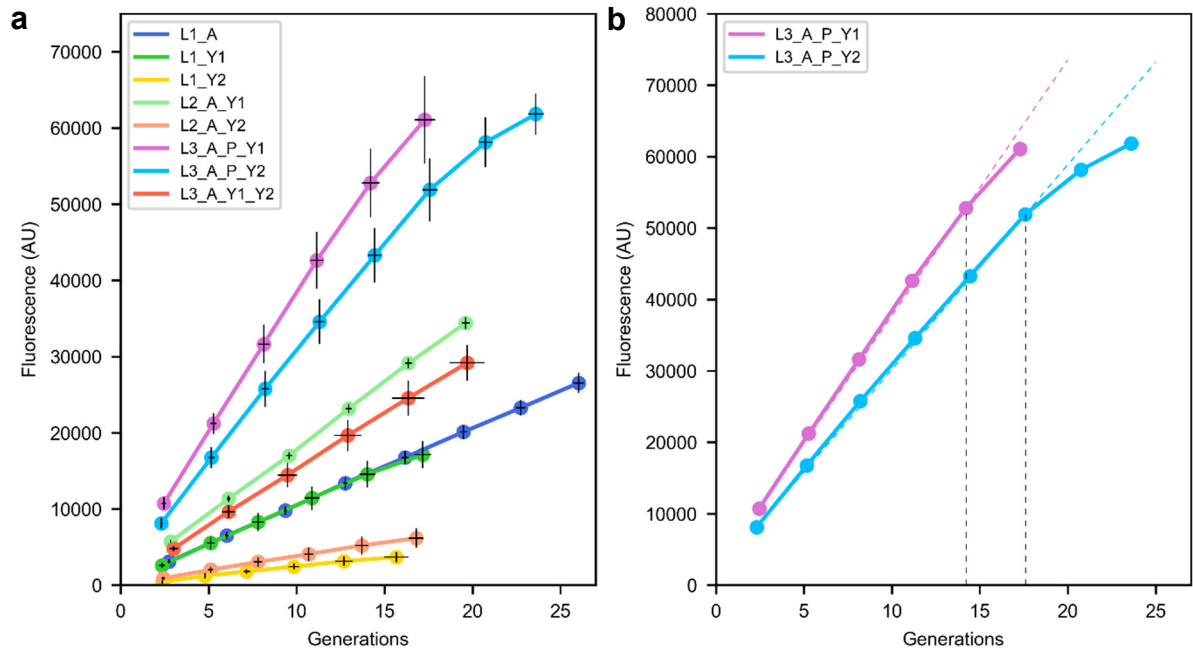

**Supplementary Figure S3.** Cumulative yECFP output profiles of the first sequential batch experiment. (a) Profile for each strain examined. The error bars represent the standard deviation. (b) Cumulative yECFP output for strains L3\_A\_P\_Y1 and L3\_A\_P\_Y2 with their estimated maximal production capacity (dotted colour lines). The difference of output between these maximal production capacities and their respective actual output indicates potential product loss (PPL). The black dotted lines represent the  $G_{ST}$  points on which the maximal production capacity is calculated.

## SUPPLEMENTARY TABLES

**Supplementary Table S1.** Homologous regions for genomic integration used in this study.

| Genomic locus | Sequence                                                                                                                                                                                                                                                                                                                                                                                                                                                                                                                                                                                                                                                                                                                                                                                                                                                                                                                                                                                                                                                                                                                                                                                                                                                                                                                                                                                                                                                                                           |
|---------------|----------------------------------------------------------------------------------------------------------------------------------------------------------------------------------------------------------------------------------------------------------------------------------------------------------------------------------------------------------------------------------------------------------------------------------------------------------------------------------------------------------------------------------------------------------------------------------------------------------------------------------------------------------------------------------------------------------------------------------------------------------------------------------------------------------------------------------------------------------------------------------------------------------------------------------------------------------------------------------------------------------------------------------------------------------------------------------------------------------------------------------------------------------------------------------------------------------------------------------------------------------------------------------------------------------------------------------------------------------------------------------------------------------------------------------------------------------------------------------------------------|
| <i>ADH6</i>   | <p><b>Upstream</b></p> <p>GTAGCGATCGACCTTAGAACTTTTATTTAGTTTGTACATATACCTCACCTGAGTTTT<br/> GCTTTTTTCTCTGGGAGCCTAAACCATTAAAAATGATATATAATAGATAATAAATCCAGG<br/> ATAAAATGTGGCTAATTGATCTTTTTTCATTTCAACTTGGTAATGACGTACTGGATACT<br/> TTCGACGCTCTTTTTTAGTCCCCGATCCCCGCTCTCCAGGACCTTGACGTGGAATTCCGA<br/> TCACAGCCACTCTCGTCACGGCTCCGTTAAAATGAATGGTTTTCCGTTACATTTACTGGT<br/> CTTTTTATCTTTTTACAGTAAATGGGTGATATACTGTGACACAATTTGTGTCTCTACTGT<br/> GTGAACTTCCATTGCTGACTAAAGATTCCCCGCTCCGCTTATATGTCCGGTCCGCTCTTG<br/> ACCGAAGATCACATTGCCAATTTTTACATCTGGAAGCGATACGACAATATAGGAGAAAA<br/> AGAAAAGTGAAAGGCAAAAAAGCACCAACAGTTCTCGAGGTGAAGTGCCGTCAATCTTCT<br/> GTATAAATTCGGCCAATTCAATCTAATTTAATAGATTTGCGACAGACTTTCACATCCACA<br/> TTCGAGGAAGAAATTCAACACAACAACAAGAAAAGCCAAAATC</p> <p><b>Downstream</b></p> <p>GTTGTCAAGCTCTTGATAAATGTAGCTCCTTTCTTTTAACTGCTCCATGTTTTGGGTCT<br/> GTATATAGGAGTGCTGTTTTAATCGATATAGGTTACATTTGAAACTTTTTTTATGATTA<br/> TAAGGTACTATTTAAATATTTACAACCTCGTACAGTTCTCTTTGTTTTTTCTCTTTTTCT<br/> CCTTGCTAAGCACCTTTAAGGTGAAAAGAAACACATATCAATACACTAACAAAAAAGGTG<br/> CACGTTTATAGGGTATCGGACAATACTATATTACTAAGCTACCAAAGCAATAGCGCCAA<br/> TAACAAAAGCTTTCATGTTAATGTTTCAGGGATGCACCGGTATTTCTTTTGCCGTGCTGA<br/> CAGTATATGTTGTGCTTTGTTTAGCGGATGAGGATGTTCCATGAATCGCTGCCGTAGGTT<br/> TGGTGGTAGATCTGTTTACCTTTTCAGTGGATGAACTTAGTTGTGATGTTAATAGCGACT<br/> TTTGCTCGAGACAATTATCGTTTCAAGGGTAGTTTACCCCTCCCGATCGGACTTTTCAG<br/> TTGAAGATTTGCAACAGTTGATGTGTTTTTCGCTTAGTGTTGATACTCCTTCTGAAT<br/> TTTTAGTTGACTTGCTTTTTGCTCCCTC</p> |
| <i>YGLC3</i>  | <p><b>Upstream</b></p> <p>GTATGCGGTGTTTCCTCTGTCCATTAAAAGCAAGTGTCTTTTCTTTAGAGTCTCGGATTA<br/> TACTATCTTGGAAGTGAGTTTTTAAAGAACCAGAATGGCAGGACACTGGAATACAGATTG<br/> GCTTTATATCGTTACTGCCGAGGGAAGACTCTCATAATATCTAAATTTTCTGTTCCGATT<br/> CTCTTACTTGCAAAATATTTTACACTCTGTGTCAGGAATAATCAGTAATTGCCTCATTGAATT<br/> ATCTTAGGTAGTTCTTTCAACTGCTATTGTATTTCAATCTTGGGGACTACAAAACGTT<br/> GTAGCAATTGTTGACGATGGTTCCTACCTGAAATATGGCCTTAAGAATTTACCGCGAGCA<br/> ACGGGAGGGATAATGTCCAACACGGCTTTTTATTATTATTTTCCGAACCTATAAAATC<br/> CATCAGTATTCCTTCAAGAGTTTTTCCGCTCTCTGGCTGAAGGCTCATTTCCATGATGGG<br/> GTCACAATTATTATCGCACACAATTTTGGTGGCGTTGAAATTGATGCCGGAATTTGCCCC<br/> AGTGCTATAGGTGTTTTACTTAACACATAATTTCTGAACCCATAATAAATGACACGTAAA</p>                                                                                                                                                                                                                                                                                                                                                                                                                                                                                                                                                                                                                                                                                                                                                                                        |

TTTCCCCTTTTTATTTAGTGGAAGTGAACCTGTTTTGCCATTAAGAAGCAAATACCTTCC  
TGTTGCTTGATTTGCCCTGTTTGTCTTATGTGTTGAAGAGAAATTAGAATATTATGTGGC  
GTATCAATGCCAAAGTATT

**Downstream**

AAAGAGCTTAGCTGTCTTAGTTAGCTTCGCTTTTTATCATAACTACACCTCCTTTAGGTA  
AAAGAGAAGTACCTCTAACTTACACTATTTCTTTCGTGGAAAGAAGCTGCACTAAAACAG  
GTTTTAAAACAGACCGATTTATTTACCATAGGATACCTACATATTTTTGTCCCCTCTACA  
TATCGTATCGCCGAGCATTTCATAGAAGTTGAACTACATCCTTATTTCAATTATGTGCAGT  
ACGAATGCATTCTTTTTGCCAGGAGACAAACCACAAATTTACATAACTGCAAATCGTACT  
GTTTTGTGGGCATTTGGGTTACATCAAGCAAGACGTACTCTCTTATTAGAGGCATAGAA  
CGAACGCTTTTACAATTCATTTTCAATTCCCTCTTCTGTTTCTCGACCTCGTTCTATGACA  
ACTCGCAACAAAAAAATGATTTCTTCTTCTTGGTCGGGTTTGGAAAGTTGTGCGAG  
AAGGCGAAATTTTCGGAAAAATGCCATCTCCTAGAATCGAACCAGGGTTTCATCGGCCAC  
AACGATGTGTACTAACCCTATACTAAGATGGCTAATTTCTTTATGAACTTTGTTGTATC  
TCAAAATGAGATATGTCAGTATGACAATACGTCATCCTAAACGTTTCAAAAACACATATG  
AAACAACCTTATAACAAAACGAACAACATGAGATAAAACCCGTCCTTCCCTAGCTGAACT  
ACCAAAAGTATAAATGCCTGAACAATTAGTTTAGATCCGAGATTCCGC

YIRCΔ6

**Upstream**

GACTCTGTGCCTGACACAATCGTCCCAGAACAGTTTATACCCCCACGTATTTTCTCCGC  
AGTTTCTAGCCGGTTAAGCACGTTGATATTGTTCTTAATGGAAGTAAGTACGAACATTTT  
TTATTTTCTCTCAATAGCGTGCCGTTTGCACAAAAAATACTTCCAAAAATAGACATATA  
TTAGGTTTTTTATGGTACCTTCTTGCTTCAAATTTTAGTTTCTTCTCATACATTCTCTC  
TAACCTAGTAAAATATGTGCGCCAATAAAGGGGAAATGTCGCTATCGCTGTATGCTTAT  
TTGACAGGTAGGCAAATATGAACGTTTTTTACCACGTTCCAACCTCCGTCCTCATACCCGT  
TGACCTTTCAAACCAAGGACAAGAATTTTGTAAGCAACTAATCGAAAGCACAAACCAT  
TTCTTTTCTTTTTCAGCCATTTATGAATTGCTCCCTCAGATTGGTGCAATCGAAAGAAGA  
AAAGTTTAATATCTTGTTTAGCACATAATTTTCGATGTACTTTTCTTTTAAATCGAAT  
TATCAGCGATTATTCAG

**Downstream**

AAGAGCCTTTGCATCTTCTGATATTTCAGTAAAGCACGACCACGTATGGATTAAGGACTGG  
GCTCATTTTCGCTAGTGCATGGGCAATTATGTTTTTAATCAGTGCTATGCACGATGACACG  
CGATAAGCTTCGCTTTTCTCAACCAATATATTTACTAAAGATTAATGCTCTTACCGCAGA  
TTACACTGCATCGCTTCAATTATTCCTGAGAAGTATTAATAAGTACGCAGAATGGTTTTA  
GCCGTGTGTTCTTCTCATATTGATTAAAGTAGAGCTAATCAGTAATACTTTTCATACAGA  
CAAGTGTCAGATAGAACCATCCAAGAATGAGTGGCTTAGTTAATTTTACAGCCGTGGTCA  
ATACAATTAGAATATGGAGAATTTGCTTTGCTTACTGGTAGAAGATACGTAAGTAATCGC  
TAATATTATTACCATATATAACGAGAGGTTTACGGAAGCGACATTGTTGATTTGAATCAT  
TGCAGTACGGTCTAAGGCGGGAAGCTTAACCTCGGATTTGGTAGGTATAATATCGCAGA  
TATTGTTTCATGTCCAACGCCGCGCACTTATCGT

PGM2

**Upstream**

TAGAGGACGTTCCCTGTATGTACTAAAATCATACTATCATCCGTTGAGGTCGAGCGGTTT  
TCTAATCTCAACACACGCTGCTGCCCCTGAGCTTGCAGCTAAGGACAACAGGGCCAACT  
TGTTCTTTCTAGGGGGGAGAGGCCCAACTTAGGCTCGGTGAAGAGAAGCGCGGAGCTCAC  
GAAAAGGGGTGGTGTGCGCACTACTTTTTCTGTTGGGGAACCTACGTGAAAGGGGACGTT  
ATACTTTTGTTATGTGCAGTTCCAGGAACAAACAGGGGTTGAAAAGTGTAAGAAATAG



TTGATTCTTTCAGAATCTGGATGACTGCCGCCCCGAACAATGTGGGAAATATAAAAAGGTA  
CCGTTAATATTGTTTCATTTTCGAAGATAGTGTTCCATGTCTTCTTCAGCGTTGCTTGA  
ACAATAGGATAATAAGAAGAAGATCAACCAATCTTCTCAGTAAAAAAGTAACAAAAGT  
TAACATAAC

**Downstream**

AACGAATGATTTACTAATGGCTTAATGATTTTCACCTTTTCAATGAATATTAACGGTAA  
AGAAGAAAATTTCAATTTTTGAACACATACTTTATATACTTAATAGATCCATATTTGGA  
CATATTAGCAAACGATTGCATAGGTTTCTGAGTCTTTTTTTTTTTTTTTCATAAGGAGG  
AGAATATTTTGGTTAATCGCAGTATCTTCTTCATAAGTGCTGTTTCTAATTATATCTAAT  
TCACGAATTTTCCCAAATTAGCGTATCCCCGAATTCAGATTACCTACCCCGAGTTTTTT  
ATTATATTTCCCTCGAGAAATCTGTAAAATGGCCGTCATCCTTAGATTTATAAATAAAAT  
GATAAAATTCAGCCAAAGTGCTCCTAAACCAGAATTGTTCAACTGGGTCAAATTATCGCG  
TATACAAATATACATATAGTAACATGCATTCTGGCGAATATCCA

---

**Supplementary Table S2.** Calculated relative expression strengths between strains (at generation 5). This data is visualised as a heatmap in Figure 1.

|            | L1_A | L1_Y1 | L1_Y2 | L2_A_Y1 | L2_A_Y2 | L3_A_P_Y1 | L3_A_P_Y2 | L3_A_Y1_Y2 |
|------------|------|-------|-------|---------|---------|-----------|-----------|------------|
| L1_A       | 1,00 | 1,21  | 5,72  | 0,59    | 3,26    | 0,32      | 0,37      | 0,69       |
| L1_Y1      | 0,83 | 1,00  | 4,74  | 0,48    | 2,70    | 0,26      | 0,30      | 0,57       |
| L1_Y2      | 0,17 | 0,21  | 1,00  | 0,10    | 0,57    | 0,06      | 0,06      | 0,12       |
| L2_A_Y1    | 1,71 | 2,06  | 9,78  | 1,00    | 5,57    | 0,54      | 0,63      | 1,18       |
| L2_A_Y2    | 0,31 | 0,37  | 1,75  | 0,18    | 1,00    | 0,10      | 0,11      | 0,21       |
| L3_A_P_Y1  | 3,15 | 3,81  | 18,05 | 1,85    | 10,28   | 1,00      | 1,16      | 2,17       |
| L3_A_P_Y2  | 2,73 | 3,30  | 15,62 | 1,60    | 8,90    | 0,87      | 1,00      | 1,88       |
| L3_A_Y1_Y2 | 1,45 | 1,75  | 8,31  | 0,85    | 4,74    | 0,46      | 0,53      | 1,00       |
